# Supplementary material for: A tetrapeptide from maize combined with probiotics exerted strong anti-inflammatory effects and modulated gut microbiota in DSS-induced colitis mice
Source: Royal Society of Chemistry journal article supplement (doi:10.1039/d2fo02678c), 2022-01-01
Supplement: d2fo02678c1.pdf [file d2fo02678c1.pdf]

1        **A tetrapeptide from maize combined with probiotics exerted strong anti-**  
2        **inflammatory effect and modulated gut microbiota in DSS-induced colitis mice**

3 Zhiguo Li,<sup>a†</sup> Shan Zhang,<sup>a†</sup> Li Xu,<sup>a</sup> Xuexun Fang,<sup>a</sup> Youzhong Wan,<sup>b</sup> Dahai Yu,<sup>a\*</sup> and  
4 Yi Guo<sup>a\*</sup>

5 <sup>a</sup> Key Laboratory for Molecular Enzymology and Engineering of Ministry of Education,  
6 School of Life Sciences, Jilin University, 2699 Qianjin Street, Changchun, 130012, P.  
7 R. China. Tel: +86-431-85155249; Fax +86-431-85155200

8 <sup>b</sup> China-Japan Union Hospital of Jilin University, Jilin University, Changchun, China  
9 130033, P. R. China

10 †These authors contributed equally to this work

11 \*Corresponding author.

12 E-mail addresses: [yudahai@jlu.edu.cn](mailto:yudahai@jlu.edu.cn) (D. Yu); [guoyi@jlu.edu.cn](mailto:guoyi@jlu.edu.cn) (Y. Guo)

13 **Supplementary figures and tables**

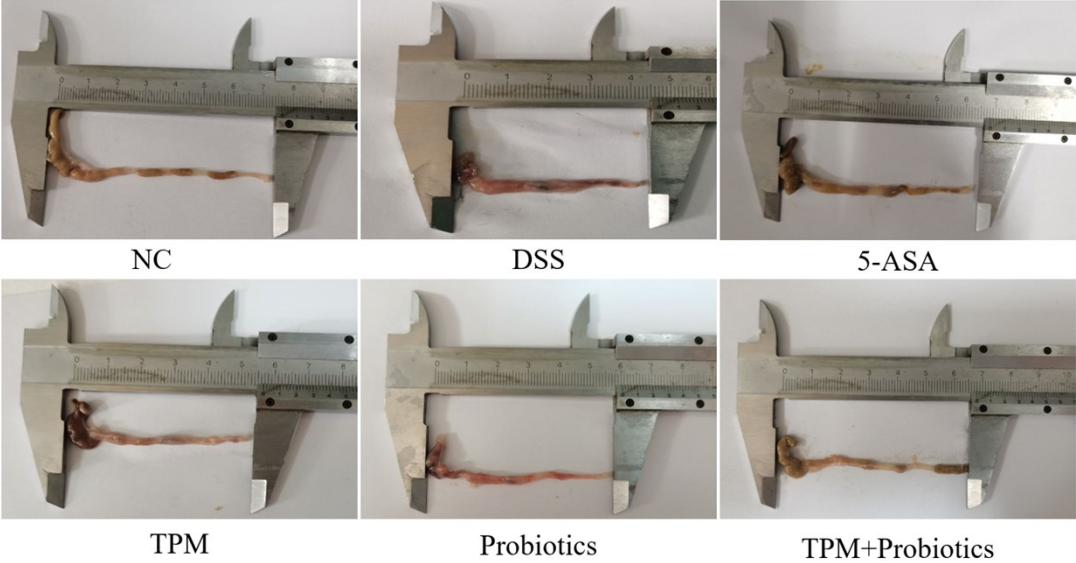

14

15 **Fig. S1** Representative colon pictures of each group.
